# Supplementary material for: Synthesis of chloroanilines: selective hydrogenation of the nitro in chloronitrobenzenes over zirconia-supported gold catalyst
Source: Royal Society of Chemistry journal article supplement (doi:10.1039/b618367k), 2007-01-01
Supplement: b618367k.pdf [file b618367k.pdf]

## Supplementary information:

**Title: Green chemistry synthesis of chloroanilines: selective hydrogenation of the nitro in chloronitrobenzenes over zirconia-supported gold catalyst**

**Authors: Daiping He, Hui Shi, Yu Wu and Bo-Qing Xu**

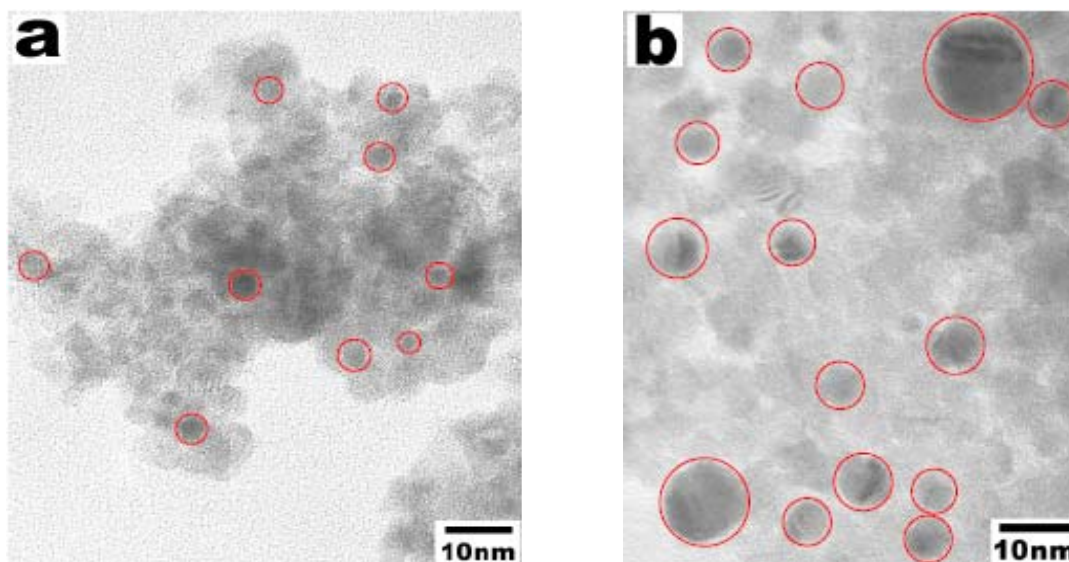

**Figure S1.** TEM images of the as-prepared fresh (a) and recovered/reacted (b) Au/ZrO<sub>2</sub> catalysts.

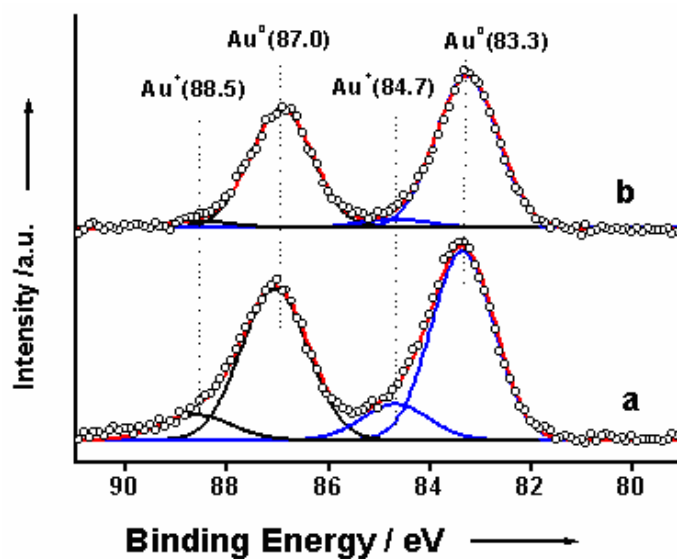

**Figure S2.** XPS spectra (Au 4f) of Au/ZrO<sub>2</sub> (as-prepared) (a) and Au/ZrO<sub>2</sub>-R (pre-reduced at 200 °C) (b) catalysts.

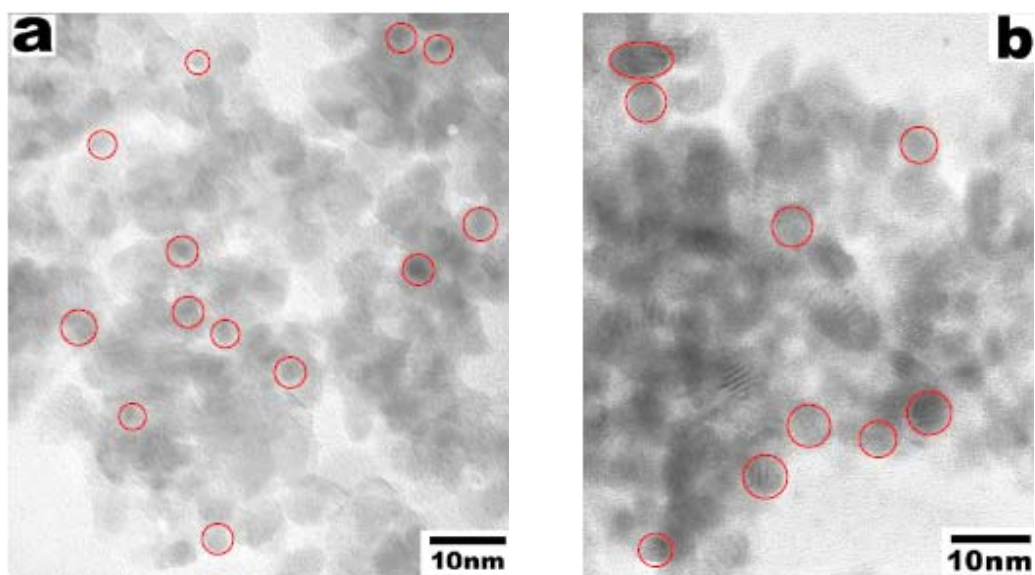

**Figure S3.** TEM images of the pre-reduced (a) and recovered/reacted (b) Au/ZrO<sub>2</sub> catalysts.

**Table S1**

Hydrogenation of *p*-chloronitrobenzene in ethanol and toluene solvents over the as-prepared Au/ZrO<sub>2</sub><sup>a</sup> catalyst

| Substrate     | Solvent | Conv. (%) | Product sel. (%) |                  | Dechlori. (%) |
|---------------|---------|-----------|------------------|------------------|---------------|
|               |         |           | <i>p</i> -CAN    | Others           |               |
| <i>p</i> -CNB | ethanol | 100       | 99.4             | 0.6 <sup>b</sup> | 0             |
|               | toluene | 100       | 100              | 0                | 0             |

<sup>a</sup> Reaction conditions: 25.0 mg catalyst, 2.0 mmol substrate in 4.0 ml ethanol (solvent), 150 °C, 1.0 MPa H<sub>2</sub>, 5 h. <sup>b</sup> N-ethyl-chloroaniline (0.5%) and bis-chlorophenyl-diazene (0.1%).
